# Supplementary material
Source: Springer Nature journal article supplement (https://www.springermedizin.de/resource/supplementary/12885_2010_2697_MOESM3_ESM.pdf/9461742)

**Hepa-1 c4**

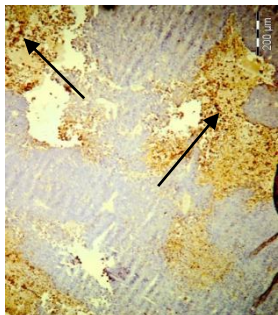

**A**

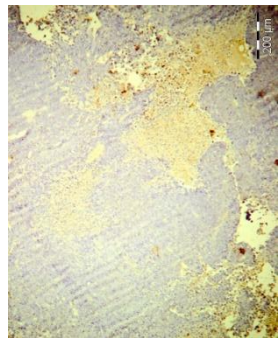

**C**

**Hepa-1 WT**

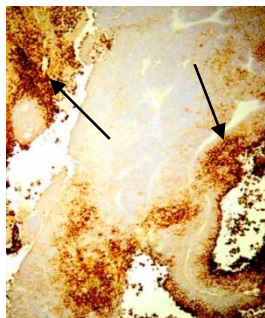

**B**

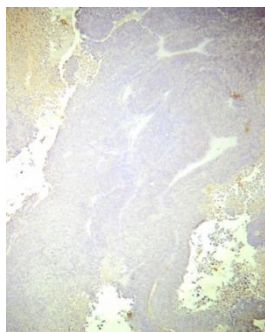

**D**

**GLUT-1**

**-ve GLUT-1**

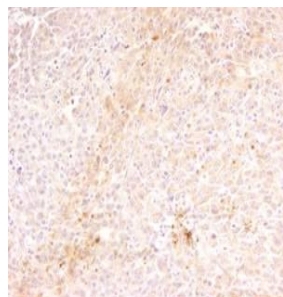

**E**

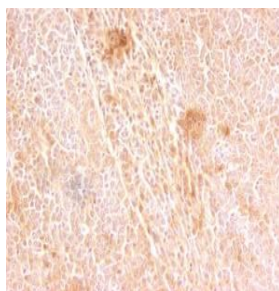

**F**

**GLUT-2**

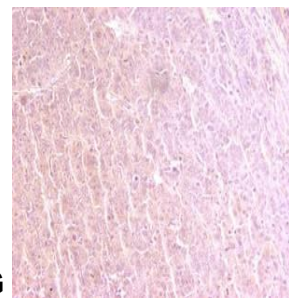

**G**

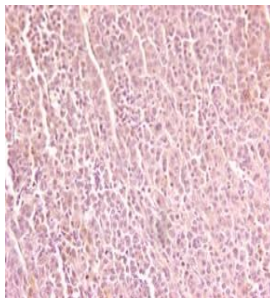

**H**

**-ve GLUT-2**

Supplement: MOESM3 [file 9461742]
